1 Homeostatic Inhibitory Control of Cortical Hyperexcitability in Fragile X Syndrome

2

3 Abbreviated Title: Plasticity of inhibitory circuitry in FXS

4

5 C.A. Cea-Del Rio<sup>1,2</sup>, A. Nunez-Parra<sup>3,4</sup>, S. Freedman<sup>1</sup>, D. Restrepo<sup>3</sup> and M.M. Huntsman<sup>1,5\*</sup>

6

7 <sup>1</sup>Department of Pharmaceutical Sciences, Skaggs School of Pharmacy and Pharmaceutical  
8 Sciences, University of Colorado, Anschutz Medical Campus, Aurora, CO

9 <sup>2</sup>CIBAP, Escuela de Medicina, Facultad de Ciencias Medicas, Universidad de Santiago de Chile,  
10 Santiago, Chile;

11 <sup>3</sup>Department of Cell and Developmental Biology, School of Medicine,  
12 University of Colorado, Anschutz Medical Campus, Aurora, CO; <sup>4</sup>Physiology Laboratory,  
13 Department of Biology, University of Chile and <sup>5</sup>Department of Pediatrics, School of Medicine,  
14 University of Colorado, Anschutz Medical Campus, Aurora, CO

15

16 \*Correspondence should be addressed to:

17 Dr. Molly M. Huntsman

18 Department of Pharmaceutical Sciences, Skaggs School of Pharmacy and Pharmaceutical  
19 Sciences and the Department of Pediatrics School of Medicine,

20 University of Colorado | Anschutz Medical Campus

21 Aurora, CO 80045

22 Phone: (303) 724-7456

23 Fax: (303) 724-2637

24 Email: Molly.Huntsman@UCDenver.edu

25

26

27

28 Number of pages: 23

29 Number of figures: 5

30 Number of words for Abstract (241), Introduction (537), and Discussion (918)

31

32 Acknowledgements: This work was supported by U.S. National Institutes of Health grants (R01  
33 DC000566 to D.R. and R01 NS095311 to M.M.H)

34

35

36

37

38

39

40

39 **Abstract**

40 In mouse models of Fragile X Syndrome (FXS), cellular and circuit hyperexcitability are a  
41 consequence of altered brain development [reviewed in (Contractor et al., 2015)]. Mechanisms  
42 that favor or hinder plasticity of synapses could affect neuronal excitability. This includes  
43 inhibitory long term depression (I-LTD) – a heterosynaptic form of plasticity that requires the  
44 activation of metabotropic glutamate receptors (mGluRs). Differential circuit maturation leads  
45 to shifted time points for critical periods of synaptic plasticity across multiple brain regions  
46 (Harlow et al., 2010; He et al., 2014), and disruptions of the development of excitatory and  
47 inhibitory synaptic function are also observed both during development and into adulthood  
48 (Vislay et al., 2013). However, little is known about how this hyperexcitable environment affects  
49 inhibitory synaptic plasticity. Our results demonstrate that the somatosensory cortex of the  
50 *Fmr1* KO mouse model of FXS exhibits *increased* GABAergic spontaneous activity, a faulty  
51 mGluR-mediated inhibitory input and impaired plasticity processes. We find the overall  
52 diminished mGluR activation in the *Fmr1* KO mice leads to both a decreased spontaneous  
53 inhibitory postsynaptic input to principal cells and also to a disrupted form of inhibitory long  
54 term depression (I-LTD). In cortical synapses, this I-LTD is dependent on mGluR activation and  
55 the mobilization endocannabinoids (eCBs). Notably, these data suggest enhanced  
56 hyperexcitable phenotypes in FXS may be homeostatically counterbalanced by the inhibitory  
57 drive of the network and its altered response to mGluR modulation.

58

59 **Significance Statement**

60 Fragile X Syndrome is a pervasive neurodevelopmental disorder characterized by intellectual  
61 disability, autism, epilepsy, anxiety and altered sensory sensitivity. In both *in vitro* and *in vivo*  
62 recordings in the somatosensory cortex of the *Fmr1* knockout mouse model of Fragile X  
63 Syndrome we show that hyperexcitable network activity contributes to ineffective synaptic  
64 plasticity at inhibitory synapses. This increased excitability prevents cortical circuits from  
65 adapting to sensory information via ineffective plasticity mechanisms.

66

67 **Introduction**

68 Fragile X Mental Retardation Protein (FMRP) is implicated in the transport of approximately 4-  
69 8% of all synaptic mRNAs and regulates the translation of numerous proteins involved in  
70 synaptic transmission and receptor systems (Brown et al., 2001). Defects underlying FXS are  
71 widely believed to lie at the level of the synapse (Zoghbi, 2003; Ebert and Greenberg, 2013)  
72 affecting both excitatory and inhibitory neurotransmission across multiple brain regions (Huber  
73 et al., 2002; Olmos-Serrano et al., 2010; Paluszkiwicz et al., 2011). Children with FXS exhibit  
74 behavioral phenotypes reflective of hyperexcitable circuitry such as a heightened response to  
75 somatosensory stimuli (Hagerman and Stafstrom, 2009). This increased/altered somatic  
76 sensitivity in FXS is prominent such that, most patients exhibit sensory “defensiveness”,  
77 meaning they retreat or pull away when touched (Miller et al., 1999). This hypersensitive  
78 phenotype has also been described in the mouse model of FXS [caused by a deletion of the  
79 fragile x mental retardation 1 (*Fmr1*) gene] in which *Fmr1* KOs have deficits in whisker-tactile  
80 learning tasks due to a hyperactive response to sensory activity (Arnett et al., 2014; He et al.,  
81 2017). This altered cortical response may result in poor signal computation, rather than  
82 decreased or non-responsiveness to relevant sensory stimulation, supporting the hypothesis  
83 that a highly active network fails to adequately decipher sensory inputs in cortex.

84 The best documented consequence of the absence of FMRP is in inhibition of its function as  
85 a repressor to RNA translation subsequent to the activation of mGluRs (Bagni and Greenough,  
86 2005). The “mGluR theory” of FXS [reviewed in (Bear et al., 2004)] accounts for the diverse  
87 neurological phenotypes associated with uncontrolled mGluR-mediated protein-synthesis-  
88 dependent functions in key brain regions. However, while alterations in excitatory synaptic  
89 function and plasticity mediated by mGluRs are well established in the *Fmr1* KO mouse model,  
90 little is known about how mGluR-mediated synaptic function and plasticity affecting inhibitory  
91 synaptic mechanisms. Electrophysiological and molecular studies identify prominent defects in  
92 inhibitory neurotransmission in behaviorally relevant forebrain regions such as the amygdala,  
93 hippocampus and cortex of the *Fmr1* KO mice (El Idrissi et al., 2005; D'Hulst et al., 2006; Gibson  
94 et al., 2008; Olmos-Serrano et al., 2010; Martin et al., 2014). Considering that sensory input  
95 computation and interpretation processes are heavily dependent on local inhibitory network

96 function [reviewed in (Maffei, 2017)], it is important to understand how the aberrant mGluR  
97 modulation seen in FXS alters inhibitory circuits of the somatosensory cortex.

98 In this study, we demonstrate that activation of mGluRs in *Fmr1* KO mice fail to activate  
99 inhibitory long term depression (I-LTD). This altered response is primarily due to a decrease in  
100 the mGluR-mediated activation of the intracellular mechanisms that lead to this phenomena  
101 including endocannabinoid signaling. These data suggest the hyperexcitable phenotype seen in  
102 humans is also found in the cortical areas of the mouse brain. Secondly, the *Fmr1* KO mice show  
103 an overall disruption of mGluR neuromodulatory and synaptic function, which will have greater  
104 impact on specialized interneuron cell populations and inhibitory plasticity phenomena  
105 Furthermore, these abnormalities could affect directly the computational processes occurring  
106 in layer 2/3 of the somatosensory cortex of the *Fmr1* KO mice disrupting the sensory perception  
107 capabilities of the network.

108

## 109 **MATERIALS AND METHODS**

### 110 *Animals*

111 All experiments were performed under protocols approved by the Ethics and Animal Care  
112 Committee of the University of Colorado | Anschutz Medical Campus (Protocol# B-  
113 102016(03)1D/00039). Both Control and *Fmr1* KO mice were acquired from the Jackson  
114 Laboratories (Bar Harbor, ME, USA) and bred onsite. The *Fmr1* KO animals obtained from these  
115 crosses were tested through genotyping protocols. Male mice utilized in this study possess the  
116 same congenic FVB background and only hemizygous for the X chromosome *Fmr1* gene were  
117 utilized for the experiments in this research.

118

### 119 *Slice preparation*

120 Postnatal 19 to 25 day old control and *Fmr1* KO mice were anesthetized by CO<sub>2</sub> inhalation and  
121 decapitated. Brains were quickly removed and placed in ice-cold oxygenated sucrose slicing  
122 solution composed of (in mM): 234 sucrose, 11 glucose, 26 NaHCO<sub>3</sub>, 2.5 KCl, 1.25 NaH<sub>2</sub>PO<sub>4</sub> 10,  
123 MgSO<sub>4</sub>, and 0.5 CaCl<sub>2</sub> (equilibrated with 95% O<sub>2</sub> and 5% CO<sub>2</sub>, pH 7.4). Coronal brain slices (300-  
124 μm-thickness) were prepared using a Vibratome (Leica VT1200S, Leica Biosystems, Buffalo  
125 Grove, IL, USA). Coronal slices were incubated in pre-warmed (36°C), oxygenated artificial

126 cerebrospinal fluid (ACSF; in mM): 126 NaCl, 26 NaHCO<sub>3</sub>, 10 glucose, 2.5 KCl, 1.25 NaH<sub>2</sub>PO<sub>4</sub>, 2  
127 MgCl<sub>2</sub>, and 2 CaCl<sub>2</sub> for at least 30 min before being transferred to the recording chamber,  
128 where they were continuously perfused with ACSF (32°C).

129

### 130 *Electrophysiology*

131 Recordings were obtained in cortical layer 2/3 in control and *Fmr1* KO mice were visually  
132 identified using differential interference contrast (DIC) on a modified Olympus upright  
133 microscope (Scientifca, East Sussex, United Kingdom). Whole cell recordings were performed  
134 with a Multiclamp 700B amplifier (Molecular Devices Corp., Sunnyvale, CA, USA), using  
135 recording pipettes (3-5 MΩ) pulled on a PC10 vertical puller (Narishige International, Amityville,  
136 NY, USA) and filled with intracellular solution containing the following (in mM): 90 CsCH<sub>3</sub>SO<sub>4</sub>, 1  
137 MgCl<sub>2</sub>, 50 CsCl, 2 MgATP, 0.2 Cs<sub>4</sub>-BAPTA, 10 HEPES, 0.3 Tris GTP, and 5 QX314 (unless otherwise  
138 stated in the manuscript). Recordings were filtered (low-pass) at 4 kHz (Bessel filter) and  
139 digitized at 10 kHz (Digidata 1440) using pClamp 10.3 software (Molecular Devices Corp.,  
140 Sunnyvale, CA, USA). Series resistances were monitored throughout each voltage-clamp  
141 recording with 50 ms, -10 mV steps and if it changed by >20%, the data were discarded.  
142 Individual inhibitory synaptic events (sIPSC) were recorded in gap free mode in the presence of  
143 NMDA and AMPA receptor antagonists (50 μM D-APV and 10 μM DNQX) to block glutamatergic  
144 currents and visually identified using pre-written custom code routines in Axograph-X  
145 (Berkeley, CA, USA). These events were analyzed by comparing amplitude and frequency  
146 between pairing ages in control and *Fmr1* KO mice. For I-LTD and Depolarization-induced  
147 suppression of the inhibition (DSI) experiments, evoked IPSCs (eIPSCs) were elicited by 1-ms-  
148 long extracellular stimuli using a concentric microelectrode (FHC) placed in layer IV of the  
149 somatosensory cortex. Recordings were regularly performed in the continuous presence of  
150 NMDA and AMPA receptor antagonists (50 μM D-APV and 10 μM DNQX) unless otherwise  
151 stated. Electrical I-LTD was commonly induced after 5 min of stable baseline by high-frequency  
152 stimulation (HFS), which consisted of 2 trains (20 s apart), each containing 100 pulses at 100 Hz.  
153 On the other hand, chemically induced I-LTD was delivered by application of 10 μM DHPG for  
154 10 minutes while eIPSC were recorded 5 min baseline and 35 min after induction protocol. The  
155 magnitude of I-LTD was estimated by comparing averaged responses 35–40 min after HFS with

156 baseline-averaged responses before induction protocol. DSI was evoked by a 1 s voltage step  
157 from -60 to 0 mV. eIPSCs were monitored every 4 s for DSI. DSI magnitude was measured as  
158 the percentage of change between the mean of the ten consecutive IPSCs preceding the  
159 depolarization and the mean of three IPSCs immediately following depolarization (acquired 3–  
160 12 s after the pulse).

161

### 162 *In vivo recordings*

163 Tetrode recordings in anesthetized and awake behaving animals were performed as previously  
164 described in (Doucette et al., 2011; Gire et al., 2013; Li et al., 2014; Li et al., 2015). Briefly, four  
165 tetrodes consisting of four polyimide-coated nichrome wires (diameter 12.5  $\mu\text{m}$ , Sandvik) were  
166 connected to a 16-channel interface board (EIB-16, Neuralynx) and fed through a housing glued  
167 to the board. Immediately before implantation the tetrodes were gold-plated to an impedance  
168 of 200-350 M $\Omega$ . Adult mice were anesthetized with an intraperitoneal injection of ketamine  
169 (100 mg/kg) and xylazine (10 mg/kg). Mice were implanted in layers 2/3 at coordinates AP:-1.46  
170 mm, ML:3 mm. The day of the surgery the optetrode was implanted 200  $\mu\text{m}$  above the final  
171 location and every day it was lowered 50  $\mu\text{m}$  until reaching a final depth of DV: 1 mm,  
172 respectively. A screw was also implanted in the skull in the opposite hemisphere (1mm right  
173 and 2mm posterior of bregma) to serve as ground reference. The animals were allowed to  
174 recover at least one week before experiments were performed. The day of the experiment,  
175 mice were placed in a 18x12x12 cm anesthesia plexiglass chamber, customized to deliver air  
176 puffs through a port while isofluorane was delivered using a vaporizer. Animal reflex responses  
177 were checked constantly through the experiments. Animal were placed next to the air puff port  
178 and positioned to get the maximal contralateral neuronal response after whiskers were  
179 stimulated with a  $\sim$ 3 L/min air puff. The output of the tetrodes was connected to a 16-channel  
180 amplifier (A-M Systems 3500) through a 1x gain headstage (Tucker-Davis Technologies). The  
181 signal was amplified 1000x and was recorded digitally at 24 kHz with a Data Translation DT3010  
182 A/D card in a PC computer controlled with a custom MATLAB (Mathworks) program. Spike  
183 clustering is explained in detail in (Li et al., 2015). Briefly, data was filtered digitally between  
184 300 to 3,000 Hz. With custom written MATLAB programs, each of the 16 channels was  
185 thresholded at three times the standard deviation of the mean. Every spike with amplitude

186 bigger than the threshold was imported into a second program (1 ms record per spike) that  
187 performed superparamagnetic clustering and wavelet decomposition of the spikes using 13  
188 different wavelets and three principal components (Quiroga et al., 2004).

189

190

## 191 RESULTS

### 192 Decreased neuromodulatory role of mGluRs on inhibitory activity in the somatosensory 193 cortex

194 As previously reported by us and others (Fanselow et al., 2008; Paluszkiewicz et al., 2011), the  
195 mGluR agonist (S)-3,5-Dihydroxyphenylglycine (DHPG, 10 $\mu$ M) increased the frequency of  
196 spontaneous inhibitory postsynaptic currents (sIPSCs) in cortical layer 2/3 pyramidal cells. We  
197 also found that this increase in frequency was attenuated in *Fmr1* KOs (Paluszkiewicz et al.,  
198 2011). To further assess the role of mGluR activity on inhibitory synapses in *Fmr1* KO mice we  
199 examined the effect of DHPG sIPSCs in pyramidal cells of layer 2/3 of somatosensory cortex of  
200 control and *Fmr1* KO animals. While unnoticed in our previous study where recordings were  
201 made at room temperature (Paluszkiewicz et al., 2011), we initially observe an increase in  
202 baseline inhibitory activity as sIPSCs in *Fmr1* KOs were increased (KO: 8.17  $\pm$  0.46 Hz) in  
203 comparison to WT mice (WT: 5.70  $\pm$  0.55 Hz,  $p$  = 0.0011). When DHPG (10 $\mu$ M) was bath  
204 applied to pyramidal cells from layer 2/3 of the somatosensory cortex from control animals,  
205 sIPSC frequency (from 6.30  $\pm$  0.90 to 11.64  $\pm$  1.20Hz,  $n$  = 12,  $p$  = 4.5e-5; Fig. 1A and C) and  
206 amplitude (from 14.75  $\pm$  1.16 to 21.90  $\pm$  2.47pA,  $n$  = 12,  $p$  = 0.005; Fig. 1A and D) were  
207 significantly increased. These responses were consistently found at DHPG concentrations  
208 between 1 to 100  $\mu$ M, with significant increases as a function of concentration for frequency  
209 and amplitude as shown in the dose-response curve in Figs. 1C and 1D. However, when DHPG  
210 was bath applied on pyramidal cells from *Fmr1* KO mice there were significantly smaller  
211 changes for sIPSC frequency and no changes were observed in amplitude for all concentrations  
212 used in the study (at DHPG 10 $\mu$ M: from 7.55  $\pm$  0.55 to 10.16  $\pm$  0.91Hz,  $p$  = 0.025, and from  
213 14.08  $\pm$  1.80 to 22.04  $\pm$  4.79pA,  $p$  = 0.1;  $n$  = 11; Fig. 1B, C and D). When we compared the  
214 magnitude of the DHPG effect on control and *Fmr1* KO animals through calculations of the ratio

215 of values for frequency and amplitude after and before DHPG activation, we found that there  
216 were significant differences especially for sIPSC frequency in *Fmr1* KO animals (at DHPG 10 $\mu$ M  
217  $2.17 \pm 0.27$ ,  $n = 12$  vs  $1.25 \pm 0.19$ ,  $n = 11$ ;  $p = 0.03$ ; Fig. 1C), and even for sIPSC amplitude at  
218 higher concentrations (at DHPG 100 $\mu$ M:  $2.51 \pm 0.30$ ,  $n = 5$  vs  $1.09 \pm 0.01$ ,  $n = 4$ ;  $p = 0.007$ ; Fig.  
219 1D). Moreover, when the same experiment was analyzed for spontaneous excitatory  
220 postsynaptic currents (sEPSCs), DHPG 10 $\mu$ M had similar effects to those observed on sIPSCs,  
221 where neither sEPSC amplitude nor frequency was significantly changed in recordings made  
222 from pyramidal cells of layer 2/3 of somatosensory cortex of *Fmr1* KO mice (from  $10.45 \pm$   
223  $0.48$ pA to  $10.25 \pm 0.54$ pA,  $n = 5$ ,  $p = 0.80$ ; and from  $15.19 \pm 1.48$ Hz to  $15.18 \pm 2.01$ ,  $n = 5$ ,  $p =$   
224  $0.99$ , respectively; Fig. 1E, F and I). Finally, we tested whether other neuromodulators are also  
225 functionally disrupted. We bath applied carbachol 10  $\mu$ M, an agonist of cholinergic receptors,  
226 and found that carbachol induced increases of sIPSC frequency (WT: from  $4.53 \pm 0.54$ Hz to  $7.73$   
227  $\pm 0.18$ Hz,  $n = 7$ ,  $p = 0.0004$ ; KO: from  $4.18 \pm 0.53$ Hz to  $7.66 \pm 0.23$ Hz,  $n = 10$ ,  $p = 0.0001$ ) and  
228 amplitude (WT: from  $16.67 \pm 0.79$ pA to  $52.45 \pm 10.28$ pA,  $n = 7$ ,  $p = 0.014$ ; KO: from  $16.89 \pm$   
229  $0.92$ pA to  $59.60 \pm 10.34$ pA,  $n = 10$ ,  $p = 0.002$ ) from in both control and *Fmr1* KO pyramidal cell  
230 recordings (Fig. 1G, H and J). These results suggest that at least the cholinergic  
231 neuromodulation on the inhibitory activity of the somatosensory cortex is functional.  
232 Altogether, our data indicates that the loss of inhibitory drive activation might be specific for  
233 signal transduction associated to mGluRs and not an overall deficiency of the synaptic network.

234

### 235 **Heterosynaptic I-LTD is impaired in *Fmr1* KO mice**

236 Several studies have reported the critical roles of mGluR-mediated plasticity in FXS (Nosyreva  
237 and Huber, 2006; Bianchi et al., 2009; Zhang et al., 2009; Auerbach and Bear, 2010; Connor et  
238 al., 2011; Chevere-Torres et al., 2012; Yau et al., 2016). In order to determine whether the  
239 decreased mGluR activation fails to induce synaptic plasticity, we tested the effects of this  
240 mGluR malfunction on both electrical and chemically-mediated heterosynaptic I-LTD (Fig.2). I-  
241 LTD was measured by analyzing the percentage of change of the integral under the curve of the  
242 eIPSC before and after the stimulation protocol. When I-LTD was induced through a protocol of  
243 high frequency electrical stimulation (HFS) on layer IV of somatosensory cortex, evoked IPSCs



244 (eIPSCs) from pyramidal cells in layer 2/3 of somatosensory cortex responded with a long-  
245 lasting depression ( $60.14 \pm 10.42\%$  of the baseline,  $n = 8$ ,  $p = 0.032$ ; Fig. 2A). In contrast, eIPSCs  
246 recorded from pyramidal cells of *Fmr1* KO mice did not change in response to our HFS  
247 stimulation ( $88.60 \pm 8.04\%$  of the baseline,  $n = 7$ ,  $p = 0.29$ ; Fig. 2C), suggesting that I-LTD is  
248 impaired in *Fmr1* KOs. To further understand the mechanisms involved in the failure to evoke  
249 the electrical-mediated I-LTD in *Fmr1*KO mice we tested whether mGluRs were critical to this  
250 response using a combination of MPEP  $4\mu\text{M}$  (2-Methy-6-(phenylethynyl)pyridine  
251 hydrochloride) and LY367385  $100\mu\text{M}$  ((S)-(+)- $\alpha$ -Amino-4-carboxy-2-methylbenzeneacetic acid)  
252 to block all group I mGluRs. When the MPEP/LY cocktail was applied, eIPSCs in pyramidal cells  
253 of control mice did not exhibit I-LTD and maintained their strength and amplitude throughout  
254 the assay ( $83.56 \pm 5.90\%$  of the baseline,  $n = 5$ ,  $p = 0.13$ ; Fig. 2D) These data suggest that group I  
255 mGluRs participate in the long-term depression synaptic plasticity process. Moreover, AM251  
256  $4\mu\text{M}$ , an antagonist of cannabinoid receptor (CB-R) also blocked the electrically-mediated I-LTD  
257 ( $96.08 \pm 21.01\%$  of the baseline,  $n = 4$ ,  $p = 0.92$ ; Fig. 2B), suggesting that the mGluRs are  
258 coupled to the activation of CB-R to mediate the depression of the inhibitory drive into  
259 pyramidal cells. Furthermore, application of H89  $10\mu\text{M}$  (N-[2-[[3-(4-Bromophenyl)-2-  
260 propenyl]amino]ethyl]-5-isoquinolinesulfonamide dihydrochloride), an inhibitor of Protein  
261 Kinase A (PKA), during the length of the experiment also blocked I-LTD ( $97.05 \pm 15.06\%$  of the  
262 baseline,  $n = 3$ ,  $p = 0.83$ ; Fig. 2D), further suggesting that PKA is also involved in the mechanism  
263 of this I-LTD response.

264 Alternatively, we tested whether direct activation of mGluRs could elicit a  
265 heterosynaptic I-LTD. Here, we applied DHPG  $10\mu\text{M}$  for 10 minutes while recording eIPSC at  
266  $0.25\text{Hz}$  for a total of 40 to 60 minutes. We found that mGluR activation evoked a chemically-  
267 induced I-LTD in layer 2/3 pyramidal cells of somatosensory cortex from control animals ( $62.94$   
268  $\pm 4.71\%$  of the baseline,  $n = 11$ ,  $p = 0.0005$ ; Fig. 3A). In order to determine if chemically-induced  
269 I-LTD is mediated through endocannabinoid (eCB) mobilization (Chevalleyre and Castillo, 2003),  
270 we showed this response is also blocked in the presence of AM251  $4\mu\text{M}$  ( $99.96 \pm 8.60\%$  of the  
271 baseline,  $n = 3$ ,  $p = 0.61$ ; Fig. 3C) suggesting that eCBs are also mechanistically involved in this  
272 type of I-LTD. In contrast, there was a lack of I-LTD in *Fmr1* KO mice ( $93.60 \pm 7.82\%$  of the

273 baseline,  $n = 7$ ,  $p = 0.49$ ; Fig. 3B) despite showing significant short term depression ( $41.81 \pm$   
274  $4.42\%$  of the baseline,  $n = 7$ ,  $p = 0.001$ ; Fig. 3B). Altogether these data suggest two important  
275 phenomena: 1) that inhibitory drive onto pyramidal cells layer 2/3 of the somatosensory cortex  
276 undergoes a heterosynaptic I-LTD in control mice that is similar to previous reports (Chevalleyre  
277 and Castillo, 2003), and 2) that I-LTD plasticity is abnormal in the somatosensory cortex of *Fmr1*  
278 KOs.

279

280 Faulty I-LTD responses in *Fmr1* KO mice can either be due to lack of direct mGluR activation or  
281 failure of the associated molecular signaling pathways. The muscarinic acetylcholine receptor  
282 (mAChR) shares common intracellular signaling pathways with mGluRs and they both are able  
283 to elicited LTD-I responses (Younts and Castillo, 2013). We tested mAChR activation in  
284 pyramidal cells from control and *Fmr1* KO mice. Similar to what we found DHPG application in  
285 control mice, bath application of the mAChR agonist muscarine ( $10\mu\text{M}$ ) elicits a long-term  
286 depression of inhibitory activity in L 2/3 pyramidal cells ( $60.79 \pm 6.34\%$  of the baseline,  $n = 5$ ,  $p$   
287  $= 0.0008$ ; Fig. 2E), thereby supporting the fact that mAChR activation can elicit I-LTD in  
288 somatosensory cortex. In contrast, muscarine application onto pyramidal cells of *Fmr1* KO mice  
289 failed to elicit I-LTD ( $113.73 \pm 13.98\%$  of the baseline,  $n = 6$ ,  $p = 0.51$ ; Fig. 2E). These results  
290 suggest that faulty I-LTD is due to a defective intracellular signaling pathway and not solely  
291 dependent on the lack of mGluR receptor activation.

292

### 293 **Depolarization induced suppression of Inhibition (DSI) is not altered in *Fmr1* KO mice**

294 The I-LTD response is dependent upon endocannabinoid (eCB) mobilization (Fig. 3). To  
295 understand other mechanisms of mGluR-dependent eCB mobilization in *Fmr1* KOs, we  
296 examined depolarization suppression of inhibition (DSI). DSI is a known form of short-term  
297 plasticity dependent on transynaptic eCB mobilization that is triggered by the depolarization of  
298 the postsynaptic neuron resulting in decreased GABA release from the presynaptic inhibitory  
299 interneuron (Varma et al., 2001). In these experiments, carbachol ( $10\mu\text{M}$ ) was bath applied to  
300 pyramidal cells to increase the amplitude of the inhibitory drive that is mediated by eCB-  
301 sensitive interneurons in the somatosensory cortex. Our results showed no significant

302 differences in DSI. When control pyramidal cells were depolarized from -60 to 0mV for 1  
303 second, sIPSC amplitudes were depressed to a  $39.24 \pm 7.66\%$  ( $n = 5$ ) and compared to  $51.87 \pm$   
304  $9.38\%$  ( $n = 9$ ) of the original amplitude in *Fmr1* KOs, indicating no significant differences  
305 between KOs and controls ( $p = 0.32$ ; Fig. 4A, and E). These responses also have similar latencies  
306 and time course for control and *Fmr1* KO cells pyramidal cells (Fig. 4D). These results indicate  
307 that eCB storage is functional in the *Fmr1* KO mouse model suggesting that the abnormalities  
308 seen in I-LTD are not due to storage deficiency of eCBs. Furthermore, when consecutive DSI  
309 protocols were applied every 2 minutes, sIPSC amplitude in both control and *Fmr1* KO mice  
310 were depressed by the same degree (data not shown), suggesting that either eCB storage  
311 capacity is sufficient to elicit DSI or that eCB synthesis rate is not altered in *Fmr1* KO mice. Thus,  
312 we conclude that deficiencies in eCBs are not directly responsible in determining the faulty long  
313 term I-LTD seen in *Fmr1* KOs.

314 Finally, we tested whether eCB receptors were functionally operative in *Fmr1* KO mice  
315 testing the effect of Win55-212-2  $5\mu\text{M}$  (an eCB agonist) on eIPSC responses from pyramidal  
316 cells. We found that an equal subset of evoked IPSCs (eIPSCs) in control (7/11) and *Fmr1* KO  
317 (3/5) pyramidal cells were depressed in response to Win55 ( $42.47 \pm 2.21\%$ ,  $n = 7$ ,  $p = 1.52\text{e-}6$ ,  
318 and  $54.83 \pm 2.04\%$ ,  $n = 3$ ,  $p = 0.011$ ), respectively (Fig. 4B and C) suggesting that eCB receptors  
319 sensitivity in the *Fmr1* KO is not different to what is seen in control animals.

320

### 321 **Inhibitory response to sensory stimulation recorded *in vivo***

322 In order to determine how neuronal circuits in layer 2/3 of somatosensory cortex respond to  
323 sensory stimulation, we recorded cellular responses in anesthetized and awake behaving  
324 control and *Fmr1* KO mice. The setup for tetrode recording in presumed pyramidal cells in  
325 layers 2/3 of somatosensory cortex in the anesthetized mouse is shown in Fig. 7A. Off line spike  
326 analyses of *in vivo* recordings revealed that in these animals the baseline rate of the recorded  
327 units (before stimulation of the whisker) is higher in *Fmr1* KO mice (Fig. 7B, t-test  $p < 0.02$ , K-S  
328 test  $p < 0.005$ ) consistent with hyperexcitability of pyramidal cells in these animals. When the  
329 contralateral whiskers are stimulated with an air puff in anesthetized animals, we find that a  
330 subset of cells respond differentially (determined with a t-test corrected for multiple

331 comparison of 1 s before the puff and 500 ms after,  $p < 0.05$ ) with either increases or decreases  
332 in firing rate (Fig. 7C) in both groups. Importantly, the units in the wild type mice respond  
333 differently to those in the in the *Fmr1* KO, with less units exhibiting a decrease in FR after the  
334 whiskers were activated (chi-square test, units decreasing FR: 8 out of 24 vs 3 out of 29,  $p = 0.04$ ;  
335 units increasing FR 2 out of 24 vs 4 out of 29,  $p = 0.5$ ). Moreover, out of the units that were  
336 statistically significantly divergent after the stimulus, exhibit a stronger tendency albeit not  
337 significant, to decrease their FR (Fig. 7D, K-S test  $p = 0.1$ ). These data suggest that the pyramidal  
338 cells are hyperexcitable and respond differently to contralateral whisker stimulation in *Fmr1* KO  
339 mice.

340

## 341 **DISCUSSION**

342 Our results demonstrate that the somatosensory cortex of *Fmr1* KO mice display an  
343 abnormal inhibitory drive with *increased* GABAergic spontaneous activity, a faulty mGluR-  
344 mediated inhibitory input and impaired plasticity processes, that could in part mediate the  
345 hyperexcitability of cortical neurons found *in vivo*. First, there is an overall diminished mGluR  
346 activation in the *Fmr1* KO mice that leads to both a decreased spontaneous inhibitory  
347 postsynaptic input to principal cells and also to a disrupted form of I-LTD. This I-LTD is  
348 dependent on mGluR activation, eCB synthesis and release, and the further activation of  
349 presynaptic PKA. These data suggest defective phenotypes in FXS such as hypersensitivity and  
350 hyperexcitability may be homeostatically counterbalanced by the inhibitory drive of the  
351 network and its altered response to mGluR modulation.

352 Here, we are the first to demonstrate that, in contrast to excitatory synapses, LTD in  
353 inhibitory (I-LTD) synapses is abolished in the *Fmr1* mice. Although these two LTD processes  
354 (excitatory and inhibitory LTDs) follow different mechanistic and intracellular pathways of  
355 activation, they have at least one critical point in common - mGluR activation. Our results reveal  
356 a faulty I-LTD in the somatosensory cortex of *Fmr1* KOs that requires the activation of mGluRs.  
357 This I-LTD also depends on eCB release, receptor activation and PKA function as is suggested by  
358 the lack of the I-LTD in control animals when mGluR, eCB receptors and PKA activity were  
359 blocked. These are all molecular components of the heterosynaptic I-LTD (Chevalleyre and

360 Castillo, 2003; Chevalyere et al., 2007), suggesting this phenomenon is similar to the one  
361 observed in the hippocampus.

362 Furthermore, although different reports suggest the possibility of direct participation of  
363 a faulty enzymatic complex to synthesize eCB in FXS (Maccarrone et al., 2010; Jung et al., 2012),  
364 our results indicate that faulty eCB synthesis is unlikely as the main cause of this faulty  
365 heterosynaptic I-LTD in FXS. This is because eCB molecular components are downstream to  
366 activation of mGluRs, limiting their participation in the I-LTD to functional mGluRs. Additionally,  
367 dysfunctional eCB molecular machinery has been proved to be altered mostly in synaptic  
368 processes in excitatory synapses without effects on inhibitory connectivity (Maccarrone et al.,  
369 2010; Jung et al., 2012). Finally, our experiments on DSI in FXS mice show that eCB activity is  
370 unaltered in terms of release and storage availability of the eCB, as well eCB receptor  
371 sensitivity. However, this finding does not discard a role for the synthesis of eCBs, but may  
372 further support a secondary role for eCB receptor activation in the faulty heterosynaptic I-LTD  
373 of the somatosensory cortex.

374 Our results suggest that different interneuron classes are contributing to abnormal  
375 activity of the somatosensory cortex network of *Fmr1* KO mice due to the diminished sensitivity  
376 of the mGluRs. Previous reports indicate that the somatostatin positive low threshold spiking  
377 cells (Sst-LTS) are especially sensitive to activation via mGluRs (Fanselow et al., 2008;  
378 Paluszkiwicz et al., 2011). Based on those findings, we speculate that the lack of response to  
379 DHPG of the sIPSC recorded from pyramidal cells in *Fmr1* KO somatosensory cortex could be  
380 due to the loss of mGluR activation sensitivity in the Sst-LTS cells. On the other hand, because  
381 the mechanism of heterosynaptic I-LTD requires the eCB molecular machinery to be activated  
382 as documented by Chevalyere and others (Chevalyere et al., 2007), it is highly likely that the  
383 interneuron classes participating in this mechanism of plasticity express eCB receptors. The  
384 main candidate for this type of response is eCB-1R-expressing perisomatic-targeting basket cells  
385 (BCs) that belong to the 5HT-3 expressing group of interneurons of the cortex, and is also  
386 characterized by the expression of cholecystokinin (CCK) as is documented in hippocampus and  
387 cortex (Foldy et al., 2007; De-May and Ali, 2013). The abnormal function of these interneuron  
388 cell types because a faulty mGluR modulation have different implications in the activity of the

389 cortical network. Although these two cell types, Sst-LTS and CCK-BCs, modulate the network in  
390 similar fashion having a role in the fine tuning of the information being processed in the cortex,  
391 they have different postsynaptic targets (perisomatic vs dendritic) and timing of the response  
392 (short vs long -term). Thus, we speculate that while the faulty modulation on the Sst-LTS cells  
393 would lead to an immediate but transient truncated inhibitory control over the excitatory  
394 activity of the somatosensory cortex, the unregulated I-LTD mediated by CCK-BCs suggest a loss  
395 of the long-term control of the inhibitory drive in the FXS animals.

396

### 397 **Homeostatic correction of excitability**

398 The responses described in this manuscript indicate that cortical network inhibition is  
399 attempting to counterbalance the hyperexcitability observed in the *Fmr1* KO mouse model of  
400 FXS. At baseline levels, inhibitory activity (sIPSCs) is higher in somatosensory cortex of *Fmr1* KOs  
401 suggesting there is an attempt to balance the heightened levels of excitatory activity observed  
402 in this disorder (Wang et al., 2017). Additionally, in the long term, inhibition is also enhanced in  
403 the form of a faulty I-LTD, which allows a persistent inhibitory drive into postsynaptic cells in  
404 periods of long lasting high cortical network activity. Interestingly, the fact that the mGluR  
405 activation loss of sensitivity in the *Fmr1* KOs could be explained by the already increased  
406 inhibitory drive in the disorder, probably at ceiling levels, which would limit the role of mGluRs  
407 on activating the network at both baseline and long-term levels. Therefore, this heightened  
408 activity likely comes at a cost of a loss of synaptic plasticity. In conclusion, the FXS inhibitory  
409 cortical network is homeostatically balancing the high excitatory profile of the disorder,  
410 attempting to provide an adequate range of functional neurotransmission modulation for  
411 behavioral-related relevant tasks.

412

413

414

415

416

417

418 **Figures and Figure legends**

419 **Figure 1.**

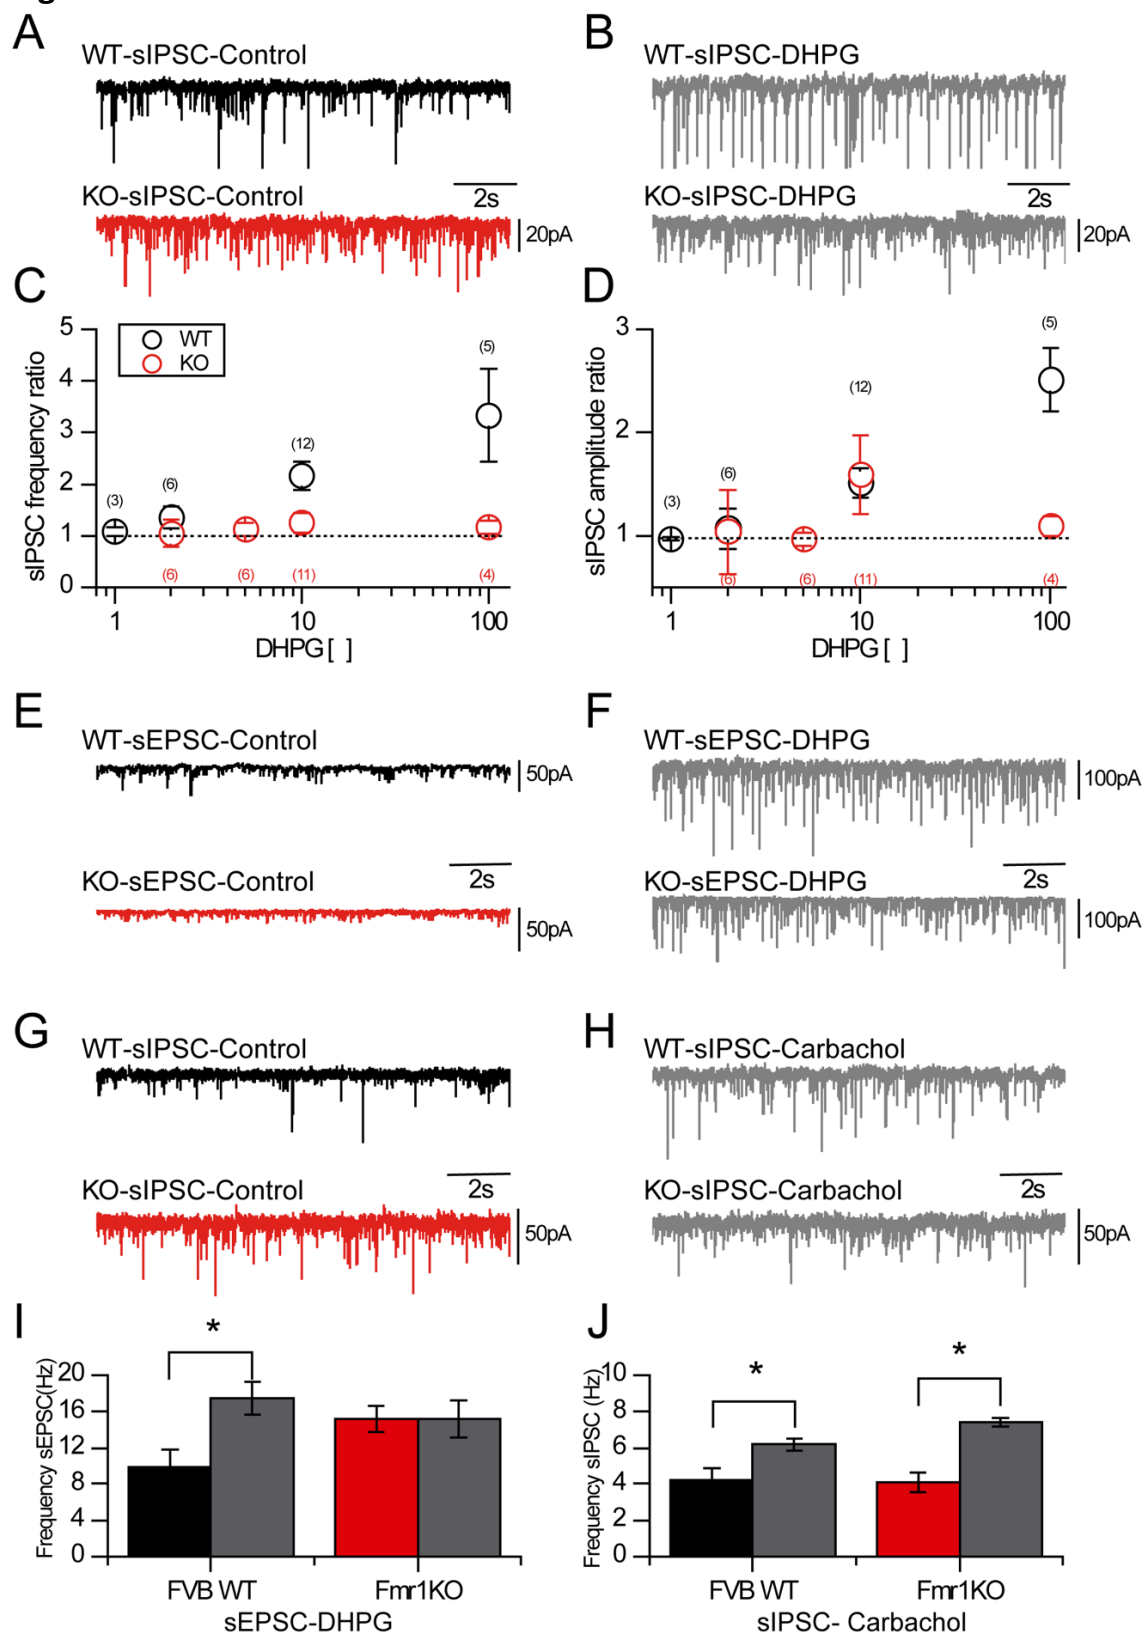

421 **Figure 1.** mGluR-mediated activation of the Inhibitory drive in FXS somatosensory cortex. (A)  
422 Representative voltage clamp traces for sIPSC activity before application of DHPG 10 $\mu$ M in  
423 pyramidal cells from wild type (black) and *Fmr1* KO (red) mouse somatosensory cortex. (B)  
424 Representative voltage clamp traces for sIPSC activity after application of DHPG 10 $\mu$ M in  
425 pyramidal cells from wild type (upper) and *Fmr1*KO (below) mouse somatosensory cortex. (C)  
426 Logarithmic population plot of sIPSC frequency activity ratio after and before application of  
427 different concentrations of DHPG recorded from pyramidal cells of wild type (black circles) and  
428 *Fmr1*KO (red circles) somatosensory cortex slices. (D) Logarithmic population plot of sIPSC  
429 amplitude activity ratio after and before application of different concentrations of DHPG  
430 recorded from pyramidal cells of wild type (black circles) and *Fmr1*KO (red circles)  
431 somatosensory cortex slices. (E) Representative voltage clamp traces for sEPSC activity before  
432 application of DHPG 10 $\mu$ M in pyramidal cells from wild type (black) and *Fmr1* KO (red) mouse  
433 somatosensory cortex. (F) Representative voltage clamp traces for sEPSC activity after  
434 application of DHPG 10 $\mu$ M in pyramidal cells from wild type (upper) and *Fmr1* KO (below)  
435 mouse somatosensory cortex. (G) Representative voltage clamp traces for sIPSC activity before  
436 application of carbachol 10 $\mu$ M in pyramidal cells from wild type (black) and *Fmr1*KO (red)  
437 mouse somatosensory cortex. (H) Representative voltage clamp traces for sIPSC activity after  
438 application of carbachol 10 $\mu$ M in pyramidal cells from wild type (upper) and *Fmr1*KO (below)  
439 mouse somatosensory cortex. (I) Bar population plot of sEPSC frequency activity recorded from  
440 pyramidal cells of wild type (black) and *Fmr1* KO (red) somatosensory cortex slices before  
441 application of DHPG 10  $\mu$ M and after (grey). (J) Bar population plot of sIPSC frequency activity  
442 recorded from pyramidal cells of wild type (black) and *Fmr1* KO (red) somatosensory cortex  
443 slices before application of carbachol 10  $\mu$ M and after (grey).  
444



445 **Figure 2.**

446

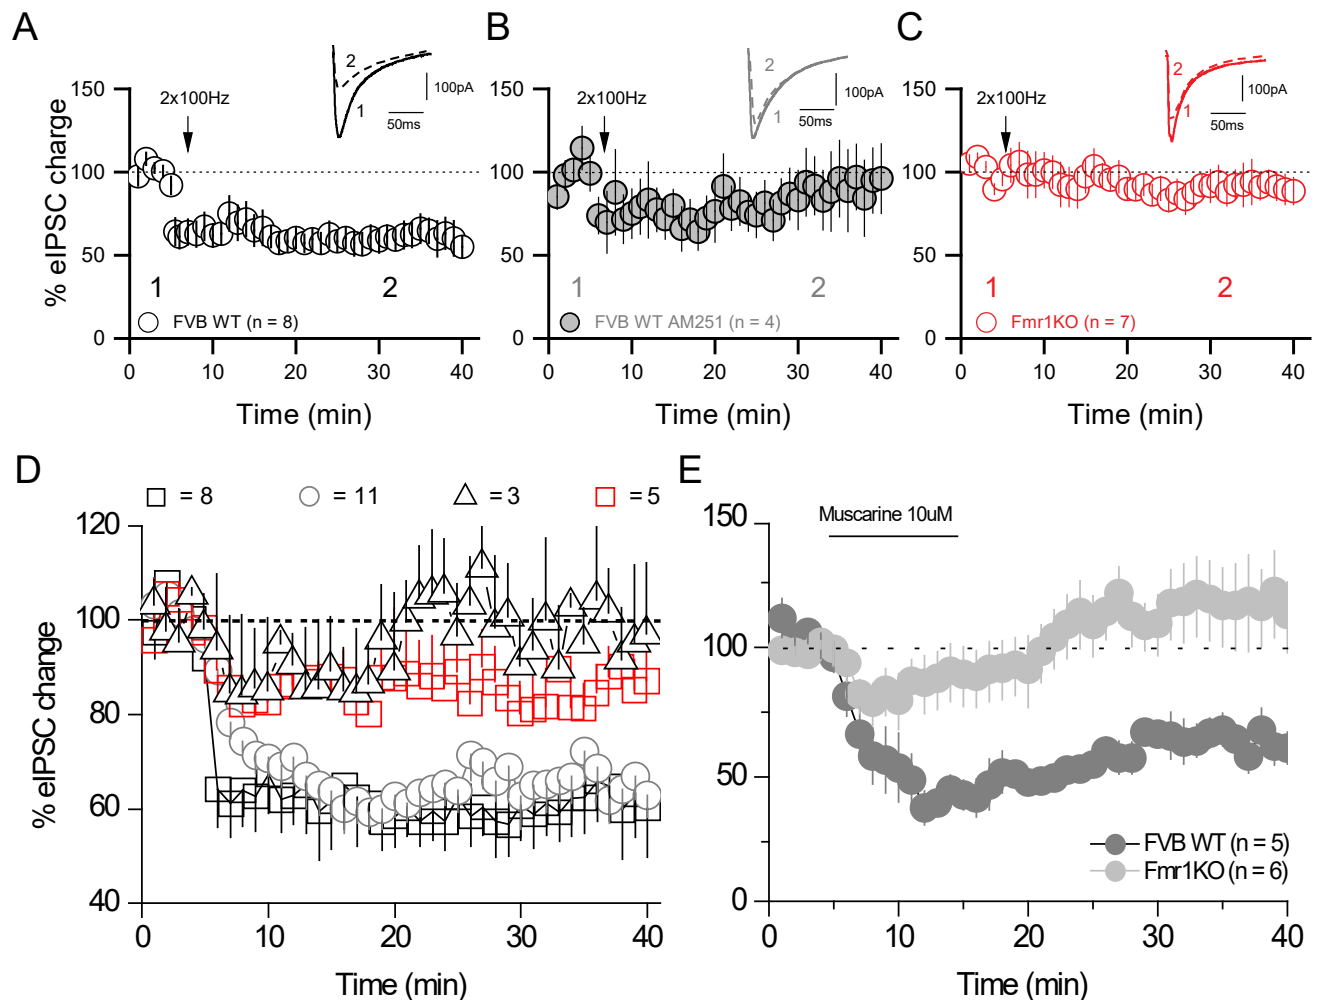

447

448 **Figure 2.** Disrupted electrical-induced heterosynaptic I-LTD in FXS somatosensory cortex. (A)  
449 Percentage of eIPSC activity change in the time from pyramidal cell population data recordings  
450 in the somatosensory cortex of WT mice before and after an electrical HFS stimulation protocol.  
451 Inset shows representative eIPSC waveform before (1) and after (2) HFS protocol. (B)  
452 Percentage of eIPSC activity change in the time from pyramidal cell population data recordings  
453 in the somatosensory cortex of WT mice before and after an electrical HFS stimulation protocol  
454 in the presence of AM251 (an eCB receptor antagonist). Inset shows representative eIPSC  
455 waveform before (1) and after (2) HFS protocol. (C) Percentage of eIPSC activity change in the  
456 time from pyramidal cell population data recordings in the somatosensory cortex of *Fmr1KO*  
457 mice before and after an electrical HFS stimulation protocol. Inset shows representative eIPSC  
458 waveform before (1) and after (2) HFS protocol. (D) Percentage of eIPSC activity change in the  
459 time from pyramidal cell population data recordings in the somatosensory cortex of WT mice  
460 before and after an electrical HFS stimulation protocol (black squares), chemically-induced  
461 protocol (grey circles), in the presence of a cocktail of MPEP/LY367385 (red squares) and in the  
462 presence of H89, a PKA inhibitor (black triangles). (E) Percentage of eIPSC activity change in the

463 time from pyramidal cell population data recordings in the somatosensory cortex of WT (filled  
464 black circles) and *Fmr1* KO (filled grey circles) mice before and after 10 min application of  
465 muscarine 10  $\mu$ M.  
466

467 **Figure 3.**

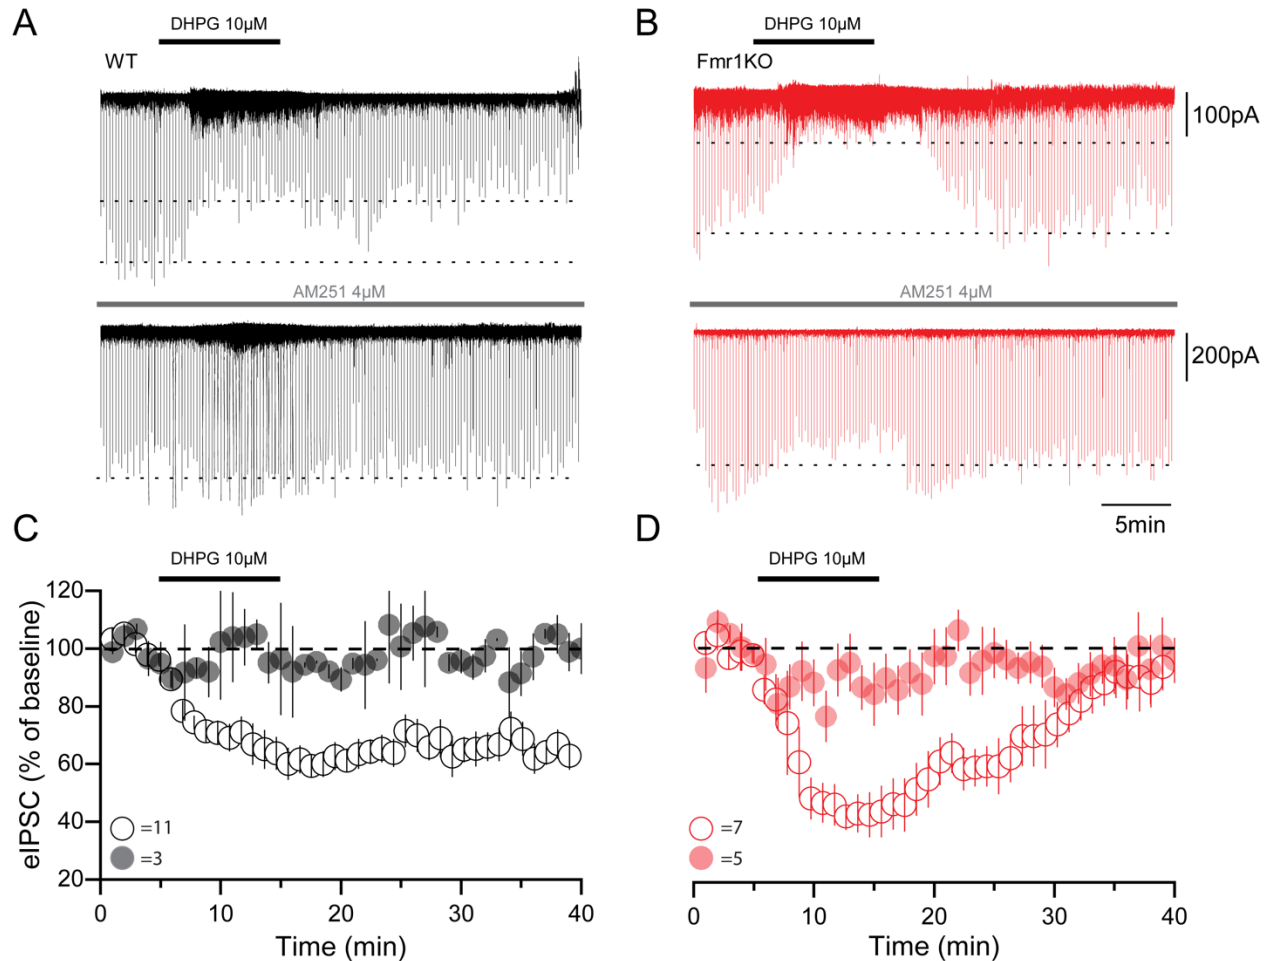

468  
469

470 **Figure 3.** Disrupted chemically-induced I-LTD in FXS somatosensory cortex. (A) Representative  
471 traces of DHPG-induced I-LTD in pyramidal cells of WT somatosensory cortex in the absence  
472 (upper trace) and presence (lower trace) of AM251 4  $\mu$ M. (B) Representative traces of DHPG-  
473 induced I-LTD in pyramidal cells of *Fmr1KO* somatosensory cortex in the absence (upper trace)  
474 and presence (lower trace) of AM251 4  $\mu$ M. (C) Percentage of eIPSC activity change in the time  
475 from pyramidal cell population data recordings in the somatosensory cortex of WT mice in the  
476 absence (open black circles) and presence (filled black circles) before and after 10 min  
477 application of DHPG 10  $\mu$ M. (D) Percentage of eIPSC activity change in the time from pyramidal  
478 cell population data recordings in the somatosensory cortex of *Fmr1KO* mice in the absence  
479 (open red circles) and presence (filled red circles) before and after 10 min application of DHPG.

480  
481  
482  
483  
484  
485

486 **Figure 4.**

487

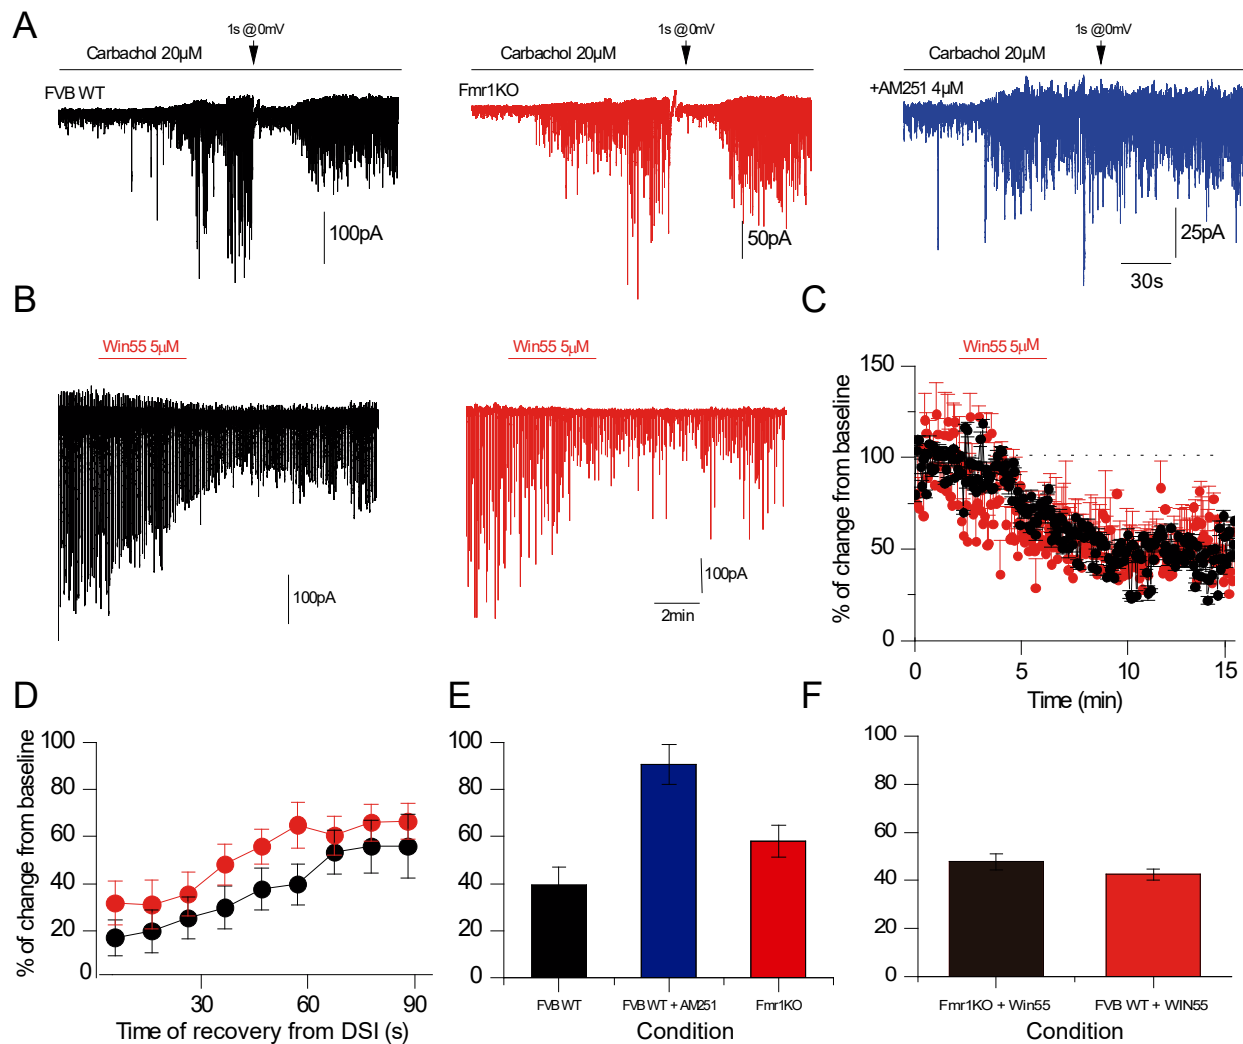

488

489 **Figure 4.** eCB machinery is intact in FXS mice. (A) Representative carbachol induced sIPSC drive  
 490 before, and after a DSI protocol of 1s of depolarization to 0mV from pyramidal cell recordings  
 491 of WT (black traces), *Fmr1KO* (red traces) and WT in the presence of AM251 (blue trace)  
 492 somatosensory cortex slices. (B) Representative traces of eIPSC before and after application of  
 493 win55-212-2 from pyramidal cells of WT (black traces) and *Fmr1KO* (red traces) somatosensory  
 494 cortex slices. (C) Data population of percentage of eIPSC change activity from pyramidal cells of  
 495 WT (black circles) and *Fmr1KO* (red circles) of somatosensory cortex slices in the presence of  
 496 win55-212-2. (D) Data population of percentage of eIPSC change activity timeline during the  
 497 next 90s after the DSI induction protocol for WT (black circles) and *Fmr1KO* (red circles)  
 498 pyramidal cells of somatosensory cortex. (E) Data population bar plots of maximal percentage  
 499 of eIPSC change activity after induction of DSI protocol. (F) Data population bar plots of  
 500 maximal percentage of eIPSC change activity after application of win55-212-2.

501

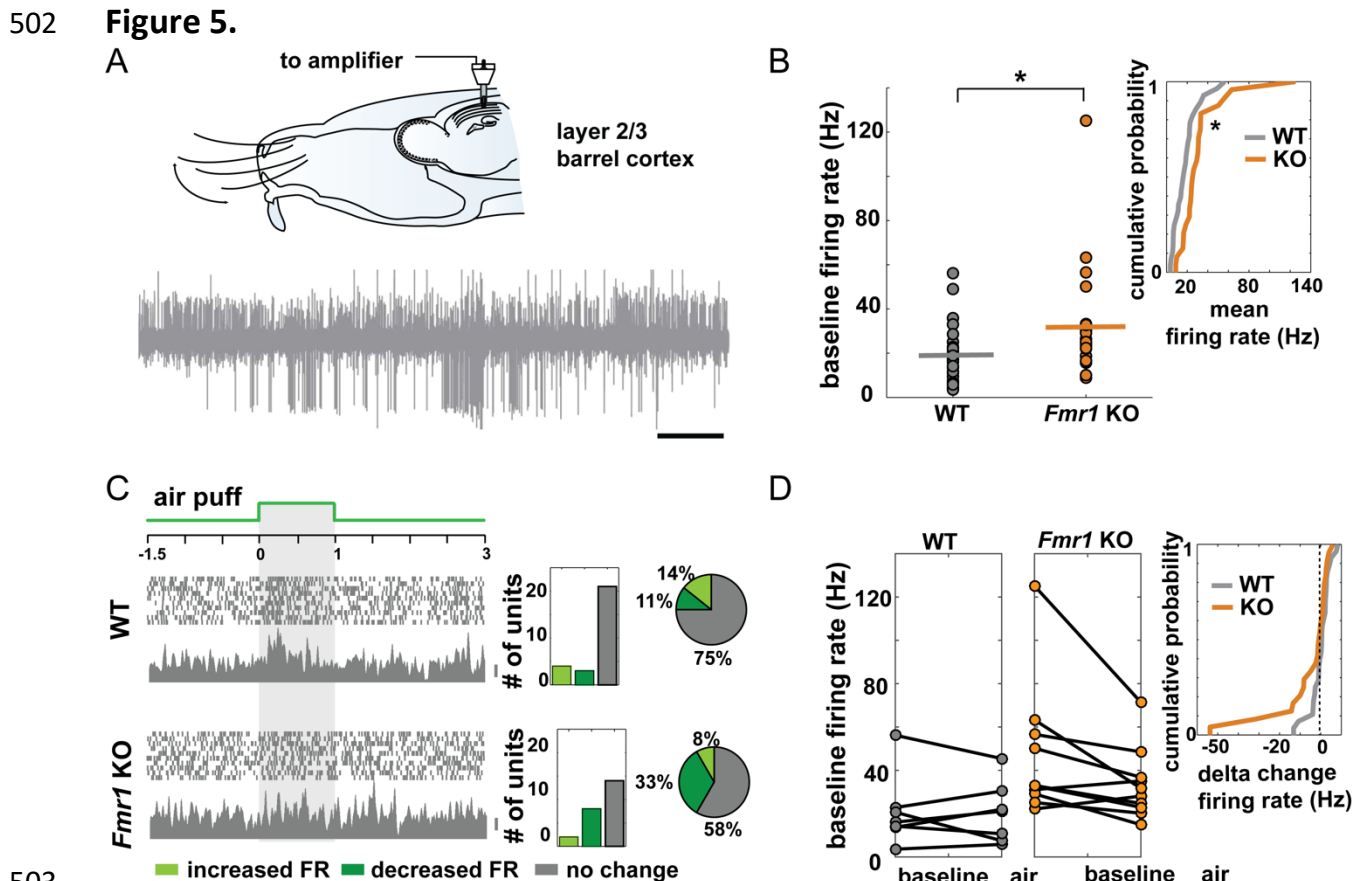

503  
 504 **Figure 5.** FXS mice cortical neurons of layer 2/3 are hyperexcited *in vivo*. (A) Diagram of the  
 505 Experimental set-up of *in vivo* electrophysiological recording. Mice were implants in layer 2/3  
 506 with a movable device with 4 tetrodes. Once the animal recovered, there were anesthetized  
 507 and contralateral whiskers were stimulated with an air puff (~3L/min). (B) Comparison of the  
 508 basal firing rate of all the neurons recorded in the WT (gray) and *Fmr1*KO (orange). (C) Left,  
 509 representative excitatory response (10 trials, spikes and PSTH shown, bar 10 spikes) of two  
 510 units (top panel WT, bottom panel, *Fmr1*KO) in response to the stimulus. The air puff was  
 511 delivered for 1 s. Right, population graph depicting the number and percentage of units that  
 512 exhibited a statistically significant increase, decrease or no change in FR after stimulus delivery.  
 513 (D) FR before and after stimulus presentation in the WT and KO and cumulative probability  
 514 analysis of the delta FR (post FR-preFR) in both strains. Right, summary of the neuronal  
 515 response to air puff determined by t-test (4) (28 units in 2 WT mice and 24 units in 2 *Fmr1* KO  
 516 mice).

517

## 518 **References**

519

- 520 Arnett MT, Herman DH, McGee AW (2014) Deficits in tactile learning in a mouse model of  
521 fragile X syndrome. *PloS one* 9:e109116.
- 522 Auerbach BD, Bear MF (2010) Loss of the fragile X mental retardation protein decouples  
523 metabotropic glutamate receptor dependent priming of long-term potentiation from  
524 protein synthesis. *Journal of neurophysiology* 104:1047-1051.
- 525 Bagni C, Greenough WT (2005) From mRNP trafficking to spine dysmorphogenesis: the roots of  
526 fragile X syndrome. *Nat Rev Neurosci* 6:376-387.
- 527 Bear MF, Huber KM, Warren ST (2004) The mGluR theory of fragile X mental retardation. *Trends*  
528 *Neurosci* 27:370-377.
- 529 Bianchi R, Chuang SC, Zhao W, Young SR, Wong RK (2009) Cellular plasticity for group I mGluR-  
530 mediated epileptogenesis. *The Journal of neuroscience : the official journal of the*  
531 *Society for Neuroscience* 29:3497-3507.
- 532 Brown V, Jin P, Ceman S, Darnell JC, O'Donnell WT, Tenenbaum SA, Jin X, Feng Y, Wilkinson KD,  
533 Keene JD, Darnell RB, Warren ST (2001) Microarray identification of FMRP-associated  
534 brain mRNAs and altered mRNA translational profiles in fragile X syndrome. *Cell*  
535 107:477-487.
- 536 Chevalyre V, Castillo PE (2003) Heterosynaptic LTD of hippocampal GABAergic synapses: a  
537 novel role of endocannabinoids in regulating excitability. *Neuron* 38:461-472.
- 538 Chevalyre V, Heifets BD, Kaeser PS, Sudhof TC, Castillo PE (2007) Endocannabinoid-mediated  
539 long-term plasticity requires cAMP/PKA signaling and RIM1alpha. *Neuron* 54:801-812.
- 540 Chevere-Torres I, Kaphzan H, Bhattacharya A, Kang A, Maki JM, Gambello MJ, Arbiser JL, Santini  
541 E, Klann E (2012) Metabotropic glutamate receptor-dependent long-term depression is  
542 impaired due to elevated ERK signaling in the DeltaRG mouse model of tuberous  
543 sclerosis complex. *Neurobiol Dis* 45:1101-1110.
- 544 Connor SA, Hoeffler CA, Klann E, Nguyen PV (2011) Fragile X mental retardation protein  
545 regulates heterosynaptic plasticity in the hippocampus. *Learn Mem* 18:207-220.
- 546 Contractor A, Klyachko VA, Portera-Cailliau C (2015) Altered Neuronal and Circuit Excitability in  
547 Fragile X Syndrome. *Neuron* 87:699-715.
- 548 D'Hulst C, De Geest N, Reeve SP, Van Dam D, De Deyn PP, Hassan BA, Kooy RF (2006) Decreased  
549 expression of the GABAA receptor in fragile X syndrome. *Brain research* 1121:238-245.
- 550 De-May CL, Ali AB (2013) Cell type-specific regulation of inhibition via cannabinoid type 1  
551 receptors in rat neocortex. *Journal of neurophysiology* 109:216-224.
- 552 Doucette W, Gire DH, Whitesell J, Carmean V, Lucero MT, Restrepo D (2011) Associative cortex  
553 features in the first olfactory brain relay station. *Neuron* 69:1176-1187.
- 554 Ebert DH, Greenberg ME (2013) Activity-dependent neuronal signalling and autism spectrum  
555 disorder. *Nature* 493:327-337.
- 556 El Idrissi A, Ding XH, Scalia J, Trenkner E, Brown WT, Dobkin C (2005) Decreased GABA(A)  
557 receptor expression in the seizure-prone fragile X mouse. *Neurosci Lett* 377:141-146.
- 558 Fanselow EE, Richardson KA, Connors BW (2008) Selective, state-dependent activation of  
559 somatostatin-expressing inhibitory interneurons in mouse neocortex. *Journal of*  
560 *neurophysiology* 100:2640-2652.

- 561 Foldy C, Lee SY, Szabadics J, Neu A, Soltesz I (2007) Cell type-specific gating of perisomatic  
562 inhibition by cholecystokinin. *Nature neuroscience* 10:1128-1130.
- 563 Gibson JR, Bartley AF, Hays SA, Huber KM (2008) Imbalance of neocortical excitation and  
564 inhibition and altered UP states reflect network hyperexcitability in the mouse model of  
565 fragile X syndrome. *Journal of neurophysiology* 100:2615-2626.
- 566 Gire DH, Whitesell JD, Doucette W, Restrepo D (2013) Information for decision-making and  
567 stimulus identification is multiplexed in sensory cortex. *Nature neuroscience* 16:991-  
568 993.
- 569 Hagerman PJ, Stafstrom CE (2009) Origins of Epilepsy in Fragile X Syndrome. *Epilepsy Currents*  
570 9:108-112.
- 571 Harlow EG, Till SM, Russell TA, Wijetunge LS, Kind P, Contractor A (2010) Critical period  
572 plasticity is disrupted in the barrel cortex of FMR1 knockout mice. *Neuron* 65:385-398.
- 573 He CX, Cantu DA, Mantri SS, Zeiger WA, Goel A, Portera-Cailliau C (2017) Tactile Defensiveness  
574 and Impaired Adaptation of Neuronal Activity in the Fmr1 Knock-Out Mouse Model of  
575 Autism. *The Journal of neuroscience : the official journal of the Society for Neuroscience*  
576 37:6475-6487.
- 577 He Q, Nomura T, Xu J, Contractor A (2014) The developmental switch in GABA polarity is  
578 delayed in fragile X mice. *The Journal of neuroscience : the official journal of the Society*  
579 *for Neuroscience* 34:446-450.
- 580 Huber KM, Gallagher SM, Warren ST, Bear MF (2002) Altered synaptic plasticity in a mouse  
581 model of fragile X mental retardation. *Proceedings of the National Academy of Sciences*  
582 *of the United States of America* 99:7746-7750.
- 583 Jung KM, Sepers M, Henstridge CM, Lassalle O, Neuhofer D, Martin H, Ginger M, Frick A,  
584 DiPatrizio NV, Mackie K, Katona I, Piomelli D, Manzoni OJ (2012) Uncoupling of the  
585 endocannabinoid signalling complex in a mouse model of fragile X syndrome. *Nat*  
586 *Commun* 3:1080.
- 587 Li A, Gire DH, Restrepo D (2015) Upsilon spike-field coherence in a population of olfactory bulb  
588 neurons differentiates between odors irrespective of associated outcome. *The Journal*  
589 *of neuroscience : the official journal of the Society for Neuroscience* 35:5808-5822.
- 590 Li A, Gire DH, Bozza T, Restrepo D (2014) Precise detection of direct glomerular input duration  
591 by the olfactory bulb. *The Journal of neuroscience : the official journal of the Society for*  
592 *Neuroscience* 34:16058-16064.
- 593 Maccarrone M, Rossi S, Bari M, De Chiara V, Rapino C, Bernardi G, Bagni C, Centonze D (2010)  
594 Abnormal mGlu 5 receptor/endocannabinoid coupling in mice lacking FMRP and BC1  
595 RNA. *Neuropsychopharmacology* 35:1500-1509.
- 596 Maffei A (2017) Fifty shades of inhibition. *Curr Opin Neurobiol* 43:43-47.
- 597 Martin BS, Corbin JG, Huntsman MM (2014) Deficient tonic GABAergic conductance and  
598 synaptic balance in the fragile X syndrome amygdala. *Journal of neurophysiology*  
599 112:890-902.
- 600 Miller LJ, McIntosh DN, McGrath J, Shyu V, Lampe M, Taylor AK, Tassone F, Neitzel K,  
601 Stackhouse T, Hagerman RJ (1999) Electrodermal responses to sensory stimuli in  
602 individuals with fragile X syndrome: a preliminary report. *Am J Med Genet* 83:268-279.

- 603 Nosyreva ED, Huber KM (2006) Metabotropic receptor-dependent long-term depression  
604 persists in the absence of protein synthesis in the mouse model of fragile X syndrome.  
605 *Journal of neurophysiology* 95:3291-3295.
- 606 Olmos-Serrano JL, Paluszkiwicz SM, Martin BS, Kaufmann WE, Corbin JG, Huntsman MM  
607 (2010) Defective GABAergic neurotransmission and pharmacological rescue of neuronal  
608 hyperexcitability in the amygdala in a mouse model of fragile X syndrome. *The Journal*  
609 *of neuroscience : the official journal of the Society for Neuroscience* 30:9929-9938.
- 610 Paluszkiwicz SM, Olmos-Serrano JL, Corbin JG, Huntsman MM (2011) Impaired inhibitory  
611 control of cortical synchronization in fragile X syndrome. *Journal of neurophysiology*  
612 106:2264-2272.
- 613 Quiroga RQ, Nadasdy Z, Ben Shaul Y (2004) Unsupervised spike detection and sorting with  
614 wavelets and superparamagnetic clustering. *Neural Comput* 16:1661-1687.
- 615 Varma N, Carlson GC, Ledent C, Alger BE (2001) Metabotropic glutamate receptors drive the  
616 endocannabinoid system in hippocampus. *The Journal of neuroscience : the official*  
617 *journal of the Society for Neuroscience* 21:RC188.
- 618 Vislay RL, Martin BS, Olmos-Serrano JL, Kratovac S, Nelson DL, Corbin JG, Huntsman MM (2013)  
619 Homeostatic responses fail to correct defective amygdala inhibitory circuit maturation in  
620 fragile X syndrome. *The Journal of neuroscience : the official journal of the Society for*  
621 *Neuroscience* 33:7548-7558.
- 622 Wang J, Ethridge LE, Mosconi MW, White SP, Binder DK, Pedapati EV, Erickson CA, Byerly MJ,  
623 Sweeney JA (2017) A resting EEG study of neocortical hyperexcitability and altered  
624 functional connectivity in fragile X syndrome. *J Neurodev Disord* 9:11.
- 625 Yau SY, Bostrom CA, Chiu J, Fontaine CJ, Sawchuk S, Meconi A, Wortman RC, Truesdell E,  
626 Truesdell A, Chiu C, Hryciw BN, Eadie BD, Ghilan M, Christie BR (2016) Impaired  
627 bidirectional NMDA receptor dependent synaptic plasticity in the dentate gyrus of adult  
628 female *Fmr1* heterozygous knockout mice. *Neurobiol Dis* 96:261-270.
- 629 Zhang J, Hou L, Klann E, Nelson DL (2009) Altered hippocampal synaptic plasticity in the *FMR1*  
630 gene family knockout mouse models. *Journal of neurophysiology* 101:2572-2580.
- 631 Zoghbi HY (2003) Postnatal neurodevelopmental disorders: meeting at the synapse? *Science*  
632 302:826-830.
- 633
